# Supplementary material
Source: HighWire-hosted journal article supplement (http://qhc.bmj.com/highwire/filestream/147570/field_highwire_adjunct_files/0/bmjqs-2012-001164supp_tables.pdf)
Supplement: bmjqs-2012-001164supp_tables.pdf [file bmjqs-2012-001164supp_tables.pdf]

**Table 1. Background characteristics of the study population**

| Profession<br>(N)                | Gender |    | Country of<br>residence | Age<br>M ( <i>SD</i> ) | Years in<br>profession<br>M<br>( <i>SD</i> ) |        | Prior training in<br>handover* |    |
|----------------------------------|--------|----|-------------------------|------------------------|----------------------------------------------|--------|--------------------------------|----|
| Primary<br>care nurse<br>(27)    | Male   | 0  | Spain                   | 7                      | 47.8                                         | 22.9   | As a student                   | 4  |
|                                  | Female | 27 | Poland                  | 7                      | (7.8)                                        | (8.7)  | As an employee                 | 7  |
|                                  |        |    | Sweden                  | 7                      |                                              |        | No training                    | 14 |
|                                  |        |    | Netherlands             | 6                      |                                              |        |                                |    |
| Primary<br>care doctor<br>(21)   | Male   | 5  | Spain                   | 9                      | 46.4                                         | 18.0   | As a student                   | 4  |
|                                  | Female | 16 | Poland                  | 4                      | (7.8)                                        | (8.9)  | As an employee                 | 4  |
|                                  |        |    | Sweden                  | 4                      |                                              |        | No training                    | 13 |
|                                  |        |    | Netherlands             | 4                      |                                              |        |                                |    |
| Secondary<br>care nurse<br>(24)  | Male   | 0  | Spain                   | 6                      | 39.4                                         | 15.7   | As a student                   | 2  |
|                                  | Female | 24 | Poland                  | 7                      | (11.7)                                       | (10.6) | As an employee                 | 9  |
|                                  |        |    | Sweden                  | 6                      |                                              |        | No training                    | 11 |
|                                  |        |    | Netherlands             | 5                      |                                              |        |                                |    |
| Secondary<br>care doctor<br>(24) | Male   | 8  | Spain                   | 6                      | 37.8                                         | 9.4    | As a student                   | 6  |
|                                  | Female | 16 | Poland                  | 4                      | (11.2)                                       | (10.9) | As an employee                 | 4  |
|                                  |        |    | Sweden                  | 6                      |                                              |        | No training                    | 13 |
|                                  |        |    | Netherlands             | 8                      |                                              |        |                                |    |

\* Note: Not all participants filled out the question on 'Prior training in handover'

**Table 2. Mean scores for the suggested training topics**

| Topics                                   | Ratings*<br>by all<br>participants | Ratings by profession*    |                            |                          |                           | Ratings by country* |             |             |            |
|------------------------------------------|------------------------------------|---------------------------|----------------------------|--------------------------|---------------------------|---------------------|-------------|-------------|------------|
|                                          | M (sd)                             | prim. care<br>nurses<br>M | prim. care<br>doctors<br>M | sec. care<br>nurses<br>M | sec. care<br>doctors<br>M | The<br>Neth.<br>M   | Poland<br>M | Sweden<br>M | Spain<br>M |
| Alertness to vulnerable groups           | 1.32 (.47)                         | 1.27                      | 1.33                       | 1.33                     | 1.35                      | 1.32                | 1.32        | 1.35        | 1.30       |
| Communication skills                     | 1.33 (.50)                         | 1.35                      | 1.29                       | 1.35                     | 1.35                      | 1.36                | 1.32        | 1.41        | 1.26       |
| What information needs to be handed over | 1.38 (.49)                         | 1.38                      | 1.38                       | 1.50                     | 1.26                      | 1.45                | 1.64        | 1.26        | 1.20       |
| Awareness of responsibility              | 1.40 (.52)                         | 1.38                      | 1.29                       | 1.46                     | 1.48                      | 1.41                | 1.55        | 1.48        | 1.22       |
| Standardized procedures                  | 1.69 (.51)                         | 1.56                      | 1.62                       | 2.00                     | 1.59                      | 1.82                | 1.59        | 1.62        | 1.73       |
| Use of tools                             | 1.78 (.64)                         | 1.85                      | 1.55                       | 1.79                     | 1.91                      | 2.36                | 1.82        | 1.59        | 1.44       |

\*(1= very important, 4= very unimportant)

**Table 3 Percentages of participants who recommend training delivery aspects**

| Aspect of the design of the training | % of all participants | % participants by profession who would recommend this |                        |                         |                          | % participants per country who would recommend this |               |                |                |
|--------------------------------------|-----------------------|-------------------------------------------------------|------------------------|-------------------------|--------------------------|-----------------------------------------------------|---------------|----------------|----------------|
|                                      | Respondents (N=27)    | Primary Nurses (N=27)                                 | Primary Doctors (N=21) | Sec. care nurses (N=24) | Sec. care doctors (N=24) | Dutch (N=23)                                        | Polish (N=22) | Swedish (N=23) | Spanish (N=28) |
| 4 hours                              | 47                    | 27                                                    | 48                     | 65                      | 50                       | 50                                                  | 48            | 31             | 61             |
| 1 day                                | 47                    | 48                                                    | 52                     | 35                      | 52                       | 57                                                  | 43            | 32             | 54             |
| Several days                         | 19                    | 35                                                    | 19                     | 13                      | 9                        | 0                                                   | 14            | 30             | 31             |
| Small group                          | 83                    | 89                                                    | 86                     | 83                      | 77                       | 96                                                  | 86            | 65             | 86             |
| Large group                          | 12                    | 11                                                    | 14                     | 4                       | 21                       | 4                                                   | 9             | 17             | 18             |
| Self-study / e-learning              | 22                    | 19                                                    | 43                     | 17                      | 8                        | 39                                                  | 5             | 27             | 14             |
| Learning on the job                  | 80                    | 70                                                    | 76                     | 88                      | 88                       | 70                                                  | 68            | 83             | 96             |
| Heterogeneous group                  | 80                    | 77                                                    | 81                     | 96                      | 65                       | 65                                                  | 77            | 91             | 85             |
| Homogeneous group                    | 32                    | 39                                                    | 33                     | 8                       | 48                       | 39                                                  | 23            | 46             | 22             |
| Assignments                          | 87                    | 85                                                    | 95                     | 88                      | 83                       | 87                                                  | 96            | 73             | 93             |
| Examination                          | 26                    | 42                                                    | 24                     | 17                      | 17                       | 30                                                  | 0             | 43             | 29             |

**Table 4. Commonly mentioned training success factors**

| Factor                                   | Examples                                                                                                                               |
|------------------------------------------|----------------------------------------------------------------------------------------------------------------------------------------|
| Promoting participation                  | Convince audience of importance of undertaking the training, clear relevance for practice                                              |
| Creating favourable workplace conditions | All staff should be trained, being able to apply in practice what was learned                                                          |
| Trainer characteristics                  | Devoted and skilled trainer                                                                                                            |
| Trainee characteristics                  | Willingness to change and learn, feeling comfortable to share opinions and experiences with each other                                 |
| Training delivery                        | Clear and comprehensive program, structure and communication, interaction with the audience, realistic examples, practical assignments |
